1     **Evaluation of a pan-*Leishmania* SL-RNA qPCR assay for parasite detection in laboratory-reared and**  
2                                   **field-collected sand flies and reservoir hosts.**

3  
4     Myrthe Pareyn<sup>1\*</sup>, Rik Hendrickx<sup>2</sup>, Nigatu Girma<sup>3</sup>, Sarah Hendrickx<sup>2</sup>, Lieselotte Van Bockstal<sup>2</sup>, Natalie Van Houtte<sup>1</sup>,  
5                                   Simon Shibru<sup>3</sup>, Louis Maes<sup>2</sup>, Herwig Leirs<sup>1</sup>, Guy Caljon<sup>2\*</sup>

6  
7                                   <sup>1</sup> Biology department, University of Antwerp, Wilrijk, Belgium

8                                   <sup>2</sup> Laboratory of Microbiology, Parasitology and Hygiene, University of Antwerp, Wilrijk, Belgium

9                                   <sup>3</sup> Biology department, Arba Minch University, Arba Minch, Ethiopia

10  
11                                   \*[myrthe.pareyn@uantwerpen.be](mailto:myrthe.pareyn@uantwerpen.be), [guy.caljon@uantwerpen.be](mailto:guy.caljon@uantwerpen.be)

## 12 Abstract

### 13 Background

14 In eco-epidemiological studies, *Leishmania* detection in vectors and reservoirs is frequently  
15 accomplished by high-throughput and sensitive molecular methods that target minicircle kinetoplast  
16 DNA (kDNA). A pan-*Leishmania* SYBR Green quantitative PCR (qPCR) assay which specifically detects the  
17 conserved spliced-leader RNA (SL-RNA) sequence has recently been developed. This study comparatively  
18 assessed the SL-RNA assay performance for the detection of *Leishmania* in field and laboratory infected  
19 sand flies and in tissue samples from hyraxes as reservoir hosts.

### 20 Principal findings

21 The qPCRs targeting SL-RNA and kDNA performed equally well on infected sand fly samples, despite  
22 preservation and extraction under presumed unfavorable conditions for downstream RNA detection.  
23 Nucleic acid extraction by a crude extraction buffer combined with a precipitation step was highly  
24 compatible with downstream SL-RNA and kDNA detection. Copy numbers of kDNA were found to be  
25 identical in culture-derived parasites and promastigotes isolated from sand fly midguts. SL-RNA levels  
26 were approximately 3-fold lower in sand fly promastigotes ( $\Delta\text{Ct}$  1.7). The theoretical limit of detection  
27 and quantification of the SL-RNA qPCR respectively reached down to  $10^{-3}$  and 10 parasite equivalents. SL-  
28 RNA detection in stored hyrax samples was less efficient with some false negative assay results, most  
29 likely due to the long-term tissue storage in absence of RNA stabilizing reagents.

### 30 Conclusion

31 This study shows that a crude extraction method in combination with the SL-RNA qPCR assay is suitable  
32 for the detection and quantification of *Leishmania* in sand flies. The assay provides complementary  
33 information to the standard kDNA assays, since it is pan-*Leishmania* specific and detects viable parasites,  
34 a prerequisite for identification of vectors and reservoirs.

## 35 Author summary

36 In order to identify vectors and reservoirs of *Leishmania*, a large number of sand fly and animal tissue  
37 samples needs to be screened, because the infection prevalence is generally low. Hence, sensitive low-  
38 cost methods are required for nucleic acid isolation and *Leishmania* detection. Most approaches amplify  
39 DNA targets, in particular minicircle kinetoplast DNA (kDNA). Recently, a qPCR was developed that  
40 detects the spliced-leader RNA (SL-RNA) sequence, which is conserved among various *Leishmania*  
41 species and allows detection of viable parasites. We show that the SL-RNA qPCR is highly compatible  
42 with a low-cost, crude extraction approach and performs equally well on laboratory and field infected  
43 sand fly samples as kDNA qPCR assays. The assay can detect  $10^{-3}$  parasite equivalent in sand flies and  
44 enables *Leishmania* quantification down to 10 parasites. We found that the copy number of SL-RNA is 3-  
45 fold lower in sand fly derived promastigotes compared to cultured promastigotes. SL-RNA detection in  
46 hyrax tissue samples appeared less efficient, which is presumably due to long-term storage without RNA  
47 stabilizing reagents. Overall, our assay is complementary to kDNA assays as it can identify viable  
48 *Leishmania* stages, which provides pivotal information for identification of reservoirs and vectors and  
49 their transmission capacity.

## 50 Introduction

51 Leishmaniasis is a vector-borne disease caused by protozoa of the genus *Leishmania*, which are  
52 transmitted during the blood feeding of female phlebotomine sand flies. The infection can be manifested  
53 in three major clinical forms: cutaneous (CL), mucocutaneous (MCL) and visceral (VL) leishmaniasis [1].  
54 In Ethiopia, *L. aethiopica* is the predominant species causing CL and its vectors are *Phlebotomus longipes*  
55 and *P. pedifer* [2–4]. Hyraxes (*Heterohyrax brucei* and *Procavia capensis*) have been found  
56 asymptotically infected with *L. aethiopica* in large numbers, indicating that they are major animal  
57 reservoirs in Ethiopia [3–5].

58 For eco-epidemiological research, there is a need for sensitive, high-throughput methods to identify and  
59 quantify *Leishmania* parasites in (potential) vectors and hosts [6]. The golden standard for parasite  
60 detection in sand flies and animal tissues is microscopic examination. This method allows to confirm the  
61 presence of viable parasites, but is time consuming and requires a substantial level of expertise [7].  
62 These drawbacks resulted in a shift towards sample screening with molecular assays. Procedures  
63 generally start with nucleic acid extraction for which efficient, but expensive kits are commercially  
64 available. Low-cost methods, like organic (*i.e.* phenol-chloroform) or chelex extractions, are widely  
65 utilized, but have disadvantages. The former method is very time consuming and often involves toxic  
66 chemicals while the latter only yields low amounts of genomic DNA [8]. Extraction approaches with lysis  
67 buffers containing SDS, EDTA, Tris-HCl and NaCl have been applied to various tissues [9], although this  
68 crude procedure may lead to inhibition in downstream molecular applications [8].  
69 A variety of (real-time) PCR methods targeting different gene fragments has been described, many of  
70 which remain to be validated on multiple *Leishmania* species and different tissues, or have issues  
71 regarding quantification [10,11]. The most commonly used PCR assay for *Leishmania* detection in  
72 sandflies [12,13] and small mammals [14–16] is targeting the minicircle kinetoplast DNA (kDNA). Because  
73 of the high kDNA copy number ( $10^4$  minicircles per parasite), very low numbers of parasites can be  
74 detected [7]. However, the nucleotide sequence and copy number sometimes differ among *Leishmania*  
75 species, impeding consistent quantification [17,18]. Another concern is that it sometimes results in false  
76 positive assay results due to its high sensitivity, even though all preventive measures to avoid  
77 contamination are taken [19–21].  
78 Few studies investigated the use of RNA targets for parasite detection, although these may be more  
79 informative than DNA targets given the ability to discriminate viable parasites [22]. Recently, a pan-  
80 *Leishmania* SYBR Green quantitative PCR (qPCR) assay has been developed, targeting the highly  
81 conserved mini-exon encoded 39 bp spliced-leader RNA (SL-RNA) sequence, which shows excellent

82 sensitivity and specificity. The assay was able to detect eight Old- and New-World *Leishmania* species  
83 with equal threshold cycle (Ct) values and was validated on tissue samples of *L. infantum* infected  
84 hamsters, promastigote spiked human blood and blood nucleic acid extracts from visceral leishmaniasis  
85 patients. It appeared that the limit of detection (LoD) of the SL-RNA qPCR was one log lower than the  
86 LoD of a Taqman multiplex assay targeting kDNA [23].

87 In this study, we aimed to evaluate the SL-RNA qPCR assay in combination with a crude extraction  
88 procedure for detection and quantification of *Leishmania* parasites in field- and laboratory-collected  
89 (infected) sand flies and hyrax tissue samples collected in Ethiopia.

## 90 **Materials and methods**

### 91 **Ethics statement**

92 The used chicken skins were obtained from day-old male chicks of a layer breed (Verpymo, Poppel,  
93 Belgium). The euthanasia of the chicks and use of laboratory rodents were carried out in strict  
94 accordance with all mandatory guidelines (EU directives, including the Revised Directive 2010/63/EU on  
95 the Protection of Animals used for Scientific Purposes that came into force on 01/01/2013, and the  
96 declaration of Helsinki in its latest version). All animal handlings were approved by the Ethics Committee  
97 of the University of Antwerp, Belgium (UA-ECD 2016–54 (2-9-2016)).

98 Hyrax trapping and sample collection in Ethiopia were conducted with authorization of the appropriate  
99 institutional authorities. Handling of the animals was carried out according to the 2016 Guidelines of the  
100 American Society of Mammalogists for use of small mammals in research and education.

### 101 **Parasites**

102 The *L. major* strain MHOM/SA/85/JISH118 used in this study was cultivated *in vitro* at 26°C in HOMEM  
103 promastigote medium (Gibco, Life Technologies, Belgium), supplemented with 10% inactivated fetal calf  
104 serum (Invitrogen, Belgium) and was sub-cultured twice weekly.

105 **Sand flies**

106 *Lutzomyia longipalpis* sand flies were maintained at the insectary of the Laboratory of Microbiology,  
107 Parasitology and Hygiene, Antwerp, Belgium. The colony was kept at 25-26°C, 75% relative humidity and  
108 12 hours light/dark photoperiod. A 30% sugar source was permanently provided to adult sand flies.  
109 *Phlebotomus pedifer* sand flies were captured in a previous study in Ochollo (6° 11' N, 37° 41' E), a village  
110 in southwestern Ethiopia where CL is endemic [24,25]. Sand flies were captured between March 2017  
111 and February 2018 using CDC light traps and sticky traps. Specimens were stored in 97% ethanol at -20°C  
112 until nucleic acid isolation was carried out in March 2018. *Leishmania* DNA positive sand flies were all  
113 *P. pedifer* infected with *L. aethiopica* [24]. Nucleic acid extracts were stored at -20°C until analysis for the  
114 current study.

115 **Hyraxes**

116 Hyraxes had been captured in Ochollo using traditional trapping methods in 2017. Nose and ear samples  
117 were collected and stored in 97% ethanol at -20°C until further handling. Molecular analyses revealed  
118 that all hyraxes were *H. brucei* infected with *L. aethiopica*. The original tissue samples in 97% ethanol  
119 were stored at -20°C until the current analysis [24].

120 **Assay comparison on field and laboratory infected sand flies and hyraxes**

121 **Experimental sand fly infection.** Laboratory reared *L. longipalpis* were starved 12 hours prior to  
122 experimental infection. About 150 sand flies were infected through a chick-skin membrane on  
123 heparinized (100 U/mL blood) heat-inactivated mouse blood spiked with *L. major* procyclic  
124 promastigotes ( $5 \times 10^6$  promastigotes/mL blood). Engorged females were separated 24 hours post blood  
125 meal and were continuously provided with 30% sugar solution. Sand flies were collected six days after  
126 infection for dissection of thorax and abdomen (n = 96).

127 **Sand fly nucleic acid isolation and purification.** Nucleic acids of experimentally infected (*L. major*) *L.*  
128 *longipalpis* were isolated with a crude extraction buffer and purified using an ethanol precipitation  
129 approach as described previously [24]. In short, individual sand fly specimens were incubated overnight  
130 in 50  $\mu$ L extraction buffer (10 mM Tris-HCl pH 8, 10 mM EDTA, 0.1 % SDS, 150 mM NaCl) and 0.5  $\mu$ L  
131 proteinase K (200  $\mu$ g/mL) without maceration. The next day, 25  $\mu$ L nuclease free water was added and  
132 the samples were heated for 5 minutes at 95°C. For nucleic acid precipitation, 20  $\mu$ L of the extract was  
133 supplemented with 1/10<sup>th</sup> volume 3 M NaOAc (pH 5.6) and 2 volumes 97% ethanol (chilled at -20°C). This  
134 suspension was left overnight, after which the samples were centrifuged for 15 minutes at 21,000 $\times$ g at  
135 4°C. The supernatant was removed and 500  $\mu$ L chilled 70% ethanol was added, followed by  
136 centrifugation under the same conditions. The supernatant was removed and the pellet was air-dried for  
137 15 minutes in a heating block at 50°C followed by resuspension in 20  $\mu$ L nuclease free water.

138 Additionally, 37 *P. pedifer* nucleic acid extracts were selected from our previous study, of which 17 were  
139 identified as *L. aethiopica* positive (kDNA and ITS-1) and 20 as negative (kDNA).

140 **DNA/RNA extraction from hyrax samples.** Seven *L. aethiopica* DNA positive (kDNA and ITS-1) and 15  
141 negative hyrax tissue samples were selected from our previous study [24]. DNA and RNA were  
142 simultaneously extracted from the original tissue samples with the NucleoSpin RNA kit and additional

143 reagents from the NucleoSpin RNA/DNA buffer set (Macherey Nagel, Germany) according to the  
144 manufacturer's instructions.

145 **Molecular screening.** Nucleic acid extracts of the sand fly and hyrax samples were subjected to three  
146 different real-time PCR approaches targeting: (i) kDNA/18S DNA in a multiplex Taqman probe assay  
147 (further referred to as 'MP kDNA qPCR' and 'MP 18S qPCR' respectively), (ii) kDNA in a SYBR Green assay  
148 with an alternate set of primers ('JW kDNA qPCR'), and (iii) SL-RNA in a SYBR Green assay ('SL-RNA  
149 qPCR'). The primers for the JW kDNA qPCR were adopted from Nicolas *et al.* and the assay was carried  
150 out as explained in our previous study [14,24], while the other assays were performed as described by  
151 Eberhardt *et al.* [23]. All extracts were 1:10 diluted to prevent qPCR inhibition and were run on a Step  
152 One Plus real-time qPCR system (Applied Biosystems, Life Technologies, Belgium). The threshold was set  
153 at 1 for each qPCR.

154 **Copy number and extraction method comparison**

155 **Promastigote isolation from sand fly midgut and culture.** We assessed whether there is a copy  
156 number difference of kDNA and SL-RNA between parasites isolated from sand fly midguts and *in vitro*  
157 cultures in HOMEM. First, an experimental infection of *L. longipalpis* with *L. major* was done to harvest  
158 promastigotes from sand fly midguts. About 200 sand flies were collected six days after feeding on a  
159 parasitized blood meal and the midguts were dissected under a dissection microscope. Pools of midguts  
160 were macerated with a pestle in 100  $\mu$ L DPBS (Gibco, ThermoFisher Scientific, Belgium) to release the  
161 parasites. Second, *L. major* promastigotes from a culture were counted using a KOVA chamber to  
162 determine the parasite concentration. An excess volume was taken for further washing steps. Both  
163 suspensions were washed twice in 100  $\mu$ L DPBS with intermediate centrifugation steps of one minute at  
164 21,300 $\times g$ . The pellet was dissolved in 100  $\mu$ L DPBS. Parasite concentrations were determined in a KOVA  
165 chamber and used to prepare two replicates of  $10^6$ ,  $10^5$  and  $10^4$  parasites in 20  $\mu$ L DPBS from  
166 promastigotes isolated from the sand fly midguts and from culture.



167 **DNA/RNA isolation and molecular screening.** To determine whether the crude extraction buffer in  
168 combination with ethanol precipitation is suitable for efficient nucleic acid isolation and subsequent  
169 downstream RNA and DNA detection, nucleic acids from three different concentrations of  
170 promastigotes, isolated from either sand fly midguts or culture medium, were extracted using (i) a  
171 Nucleospin RNA kit and additional RNA/DNA buffer set and (ii) the crude extraction buffer and ethanol  
172 precipitation approach. For the latter, the complete volume of the nucleic acid extract was used for  
173 ethanol precipitation. The final elution volumes were equalized to ensure the same relative DNA and  
174 RNA yields for both methods. All extracts were subjected in duplicate to the JW kDNA and SL-RNA qPCRs.

### 175 Sand fly spiking

176 Promastigotes (*L. major*) were harvested from a stationary-phase culture and washed with DPBS. The  
177 number of promastigotes was determined in a KOVA counting chamber and the pellet was stored at -  
178 20°C until extraction. Naive *L. longipalpis* sand flies were spiked with a 10-fold serial dilution of *L. major*  
179 promastigotes, ranging from  $1.6 \times 10^7$  to  $1.6 \times 10^{-6}$  parasites. The samples were extracted with the crude  
180 extraction buffer and ethanol precipitation approach, and subsequently subjected in duplicate to the SL-  
181 RNA qPCR.

### 182 Data analysis

183 Analyses were carried out using GraphPad Prism version 8 (GraphPad Software, La Jolla California, USA).  
184 The correlation between the Ct values of the SL-RNA assay and the other three qPCRs was determined by  
185 a Pearson correlation. This analysis was performed using the infected field-collected sand flies because  
186 of the broad range of Ct values. A standard curve with linear regression and PCR efficiency was  
187 generated to determine the theoretical LoD and limit of quantification (LoQ) of the SL-RNA qPCR.

## 188 Results

### 189 Comparison of *Leishmania* detection assays

190 Of the 96 *L. major* infected laboratory *L. longipalpis* sand flies, two samples were negative and 82 were  
191 positive by all assays (Fig 1A, S1 Table A). Among the samples that were positive by all qPCRs, the 18S  
192 DNA qPCR showed the highest mean Ct value ( $30.3 \pm 2.3$ ), followed by the MP kDNA qPCR ( $17.3 \pm 1.4$ ),  
193 JW kDNA qPCR ( $14.6 \pm 1.4$ ) and SL-RNA qPCR ( $13.8 \pm 0.9$ ). Ten samples were not detected with the 18S  
194 DNA qPCR, but were positive for the other three assays. These samples had higher mean Ct values of  
195  $21.4 (\pm 4.4)$ ,  $17.5 (\pm 3.1)$  and  $17.1 (\pm 2.4)$  for the MP kDNA, JW kDNA and SL-RNA assays respectively.  
196 Two sand fly specimens with the highest Ct values in the JW kDNA ( $27.1 \pm 0.2$ ) and SL-RNA qPCRs ( $25.7 \pm$   
197  $0.7$ ) could not be identified by the MP kDNA qPCR. Overall, the JW kDNA and SL-RNA qPCRs provided  
198 concordant results and performed equally well on the laboratory infected sand flies.

199 **Fig 1: PCR cycle threshold (Ct) values of laboratory and field infected sand flies and infected hyrax tissue samples.** Mean Ct  
200 value and error bars (standard deviation) are presented for the samples that were positive in all assays that they were tested  
201 for. Due to technical issues, the analysis of the 18S DNA qPCR on hyrax tissue samples was not included.

202 Among the field collected, ethanol stored sand fly specimens, 20 were negative and 17 positive in all four  
203 assays (Fig 1B, S1 Table B). Mean Ct values of the JW kDNA and SL-RNA qPCRs were similar ( $13.7 \pm 3.9$   
204 and  $14.7 \pm 3.4$  respectively) and consistently lower than the Ct values obtained by the other two assays  
205 (18S DNA:  $24.2 \pm 4.2$  and MP kDNA:  $22.9 \pm 4.2$ ). The difference in Ct values between the MP kDNA and  
206 JW kDNA qPCRs was larger for *P. pedifer* infected with *L. aethiopica* than for *L. longipalpis* infected with  
207 *L. major* (Fig 1A versus 1B).

208 Seven out of 22 long-term stored hyrax tissue samples tested positive in two or more qPCR assays (Fig  
209 1C, S1 Table C). Four samples were positive in all assays, resulting in the lowest Ct values for the JW  
210 kDNA qPCR ( $16.6 \pm 1.7$ ), compared to the SL-RNA qPCR ( $27.5 \pm 2.8$ ) and MP kDNA qPCR ( $32.6 \pm 1.2$ ). Two

211 samples with high Ct values in the JW kDNA and SL-RNA qPCRs were negative for the MP kDNA qPCR,  
212 while one sample was positive for the MP kDNA and JW kDNA qPCRs with high Ct values, but not for the  
213 SL-RNA assay.  
214 Overall, the Pearson correlation showed that the SL-RNA qPCR correlated quite well with the Ct values of  
215 the JW kDNA (Fig 2A;  $R^2 = 0.82$ ,  $n = 17$ ), MP kDNA (Fig 2B;  $R^2 = 0.90$ ,  $n = 17$ ) and 18S DNA assays (Fig 2C;  
216  $R^2 = 0.88$ ,  $n = 17$ ). For all comparisons, the confidence intervals increased towards the higher Ct values,  
217 which could be due to slight inhibition of the SL-RNA qPCR.

218 **Fig 2: Correlation between Ct values obtained by the SL-RNA qPCR and the (A) JW kDNA qPCR, (B) MP kDNA qPCR and (C) 18S**  
219 **DNA qPCR.** Pearson correlation analysis of the results obtained with the different assays. Linear regression and 95% confidence  
220 intervals (dotted lines) are shown in the graphs. Ct = cycle threshold value.

### 221 Extraction method comparison and copy number difference

222 The crude extraction buffer with ethanol precipitation and column purification (respectively referred to  
223 as 'crude' and 'column' in Fig 3) methods showed similar extraction efficiencies for kDNA, with  
224 comparable Ct values obtained for the standardized concentrations of promastigotes isolated from  
225 culture or sand fly midguts. Likewise, both methods performed well for SL-RNA extraction, although the  
226 RNA yield appeared even slightly higher (on average 1.5 Ct lower values) with the crude method. The  
227 kDNA copy number was similar for promastigotes isolated from culture and sand fly midguts (Fig 3, grey  
228 versus black symbols). For SL-RNA, both extraction methods revealed that the Ct values for sand fly  
229 derived promastigotes were slightly but consistently higher (1.7 Ct on average) than those for culture-  
230 derived promastigotes. The JW kDNA qPCR reaction suffered inhibition in both runs for  $10^6$   
231 promastigotes isolated from sand fly midguts (Fig 3, lacking grey circle for 'crude').

232 **Fig 3: Extraction method and copy number comparison.** Ct values of promastigotes isolated from culture (black symbols) and  
233 sand fly midguts (grey symbols) that were extracted with a commercial column extraction ('column') or crude high-salt

234 extraction buffer ('high-salt') and subjected to JW kDNA and SL-RNA qPCRs. Each symbol presents the assay result for a  
235 standardized concentration of promastigotes that was used for the comparisons. Ct = cycle threshold value.

## 236 LoD and LoQ of the SL-RNA qPCR

237 Based on the serial dilution of *L. longipalpis* sand flies spiked with *L. major* promastigotes, the theoretical  
238 LoD of the SL-RNA qPCR was  $10^{-3}$  parasite equivalents (Fig 4A). For  $1.6 \times 10^7$  promastigotes, the assay did  
239 not provide a result in any of the two independent runs, implying that there was PCR inhibition at this  
240 concentration. The assay showed a very good PCR efficiency of 105% for the serial dilution down to 10  
241 parasites, representing the theoretical LoQ. A Pearson correlation demonstrated an excellent inter-run  
242 stability for the two independent runs of the SL-RNA qPCR on the serial dilution (Fig 4B;  $R^2 = 0.99$ ,  $n = 10$ ).

243 **Fig 4: Performance of the SL-RNA qPCR on a serial dilution of *L. longipalpis* sand flies spiked with *L. major* promastigotes.** (A)  
244 Standard curve with linear regression and qPCR efficiency. The open symbols depict all concentrations that were detected by  
245 the assay, while the filled symbols are the parasite concentrations that show a linear correlation. (B) Inter-run variability of the  
246 SL-RNA qPCR in two replicates, analyzed by a Pearson correlation and linear regression analysis. Dotted lines indicate the 95%  
247 confidence intervals. Ct = cycle threshold value.

## 248 Discussion

249 For eco-epidemiological surveys, researchers currently opt for sensitive high-throughput molecular  
250 screening methods for *Leishmania* detection in sand flies and potential reservoirs, because infection  
251 prevalence is overall quite low, even in endemic areas [24,26]. These molecular methods most often  
252 target DNA sequences, which may persist for quite some time after parasite death. Hosts and sand flies  
253 can be exposed to the parasite without establishment of an infection. Hence, it would be highly  
254 informative to be able to specifically detect viable parasites. In our study, we evaluated whether the  
255 recently developed SL-RNA qPCR assay by Eberhardt *et al.* [23] enables *Leishmania* detection in sand flies  
256 and skin tissue from CL infected animals. The targeted 39 bp SL-RNA sequence is conserved amongst  
257 *Leishmania* species and fulfils an essential function in RNA trans-splicing and polyadenylation processes

258 [27]. To our knowledge, this study is the first to evaluate the use of an RNA target for *Leishmania*  
259 detection in vectors and field-sampled tissue of reservoir hosts. Since RNA quickly decays after death of  
260 the infectious agent, it is considered as a promising detection marker for viable *Leishmania* parasites  
261 [22,28,29], although the half-life of SL-RNA as small nuclear RNA molecule remains to be determined.  
262 We comparatively assessed the performance of four molecular diagnostic assays on field and laboratory  
263 infected sand flies and hyrax tissue samples. The JW kDNA [14,24] and SL-RNA qPCRs [23] showed the  
264 best performance using the laboratory *L. major*-infected *L. longipalpis* and field-collected *L. aethiopica*-  
265 infected *P. pedifer* sand flies. Both assays identified the same positive and negative samples, indicating  
266 that they have a similar analytical sensitivity and specificity. It was surprising that the SL-RNA qPCR  
267 performed very well on field-collected sand flies, considering that these samples had not been preserved  
268 under favorable conditions for RNA, which may relate to the short amplicon length [30,31]. These  
269 observations indicate that SL-RNA could be an interesting target for *Leishmania* detection in vectors  
270 collected during entomological surveys.

271 On the contrary, the MP kDNA and 18S DNA qPCRs could not identify all positive laboratory infected  
272 sand flies. One reason is the low copy number of the 18S rDNA fragment (50-200 copies per *Leishmania*  
273 genome) [32] compared to the much higher copy number of SL-RNA (a single *Trypanosoma* cell contains  
274 about 8,600 copies [33]) and kDNA (a *Leishmania* parasite contains approximately 10,000 copies [34]).  
275 Whereas the copy number of kDNA was fairly similar in promastigotes isolated from sand flies and from  
276 culture, SL-RNA appears to be slightly less abundant in parasites isolated from sand flies. This may  
277 indicate a reduced transcriptional activity of the vector-derived parasite pool (containing various life  
278 cycle stages) as compared to culture-derived parasites.

279 The MP kDNA qPCR could not identify some of the laboratory infected sand flies that were positive by  
280 the JW kDNA and SL-RNA qPCRs, most probably because multiplex qPCRs are commonly slightly less  
281 sensitive than uniplex assays [35,36]. Additionally, the MP kDNA qPCR provided higher Ct values on the

282 field-collected sand flies, which most likely relates to mismatches of the reverse primer with the  
283 *L. aethiopica* kDNA fragment (S1 Fig) [17]. Earlier observations of a lower sensitivity for *L. tropica*  
284 (genetically very similar to *L. aethiopica*) and *L. mexicana* [23] corroborates the limitations of this MP  
285 kDNA assay that was originally developed by Mary *et al.* for detection of *L. donovani* [17]. The SL-RNA  
286 qPCR provided equal Ct values for various *Leishmania* species, demonstrating its suitability as a pan-  
287 *Leishmania* assay [23].

288 Although only a few positive hyrax tissue samples were tested, the JW kDNA qPCR performed best under  
289 the used sample storage conditions. A sample was considered positive if identified by two different  
290 assays. The SL-RNA assay identified one false negative sample and showed generally higher Ct values  
291 compared to the JW kDNA PCR than for the sand fly screening, which is probably due to the fact that the  
292 samples had been stored in ethanol for two years before DNA/RNA extraction was performed. Most  
293 likely, proper RNA storage conditions and/or immediate RNA isolation would result in a substantially  
294 improved performance of the SL-RNA qPCR on tissue samples [31,33]. Favoring this viewpoint, the SL-  
295 RNA qPCR showed excellent analytical sensitivity in laboratory infected (*L. infantum*) mouse spleen and  
296 liver samples, detecting down to  $10^{-3}$  parasite equivalents per mg tissue [23].

297 Considering the large sample size that needs to be screened in search for positive field specimens, a low-  
298 cost, efficient nucleic acid extraction method is preferred [9]. We found that a crude extraction buffer in  
299 combination with an ethanol precipitation step is as efficient as a commercial column extraction for  
300 downstream DNA and RNA detection in sand flies. Ct values tended even slightly lower when the  
301 extraction was carried out with the crude method, suggesting that there is some nucleic acid loss on the  
302 silica columns. Other important advantages of this crude extraction method are the low-cost and  
303 reduction in sample processing time as maceration is not required [8,9]. The latter is compensated by a  
304 more time-consuming ethanol precipitation step. However, because of the low prevalence in field

305 collected sand flies, individual extracts can be pooled to reduce the number of samples for purification  
306 and PCR [24].

307 Determination of the viable parasite load in sand flies can be highly informative, especially for studies  
308 that investigate *e.g.* the vectorial capacity. Previously, the LoD of the SL-RNA qPCR on cultured  
309 promastigotes has been established at 0.0002 parasite equivalents [23]. We assessed the theoretical LoD  
310 of the SL-RNA qPCR based on sand flies spiked with a serial dilution of *L. major* promastigotes. The  
311 determined theoretical LoD of  $10^{-3}$  parasite equivalents per reaction of our assay is similar to findings of  
312 Bezerra-Vasconcelos *et al.*, who could detect  $10^{-3}$  parasites per reaction with a kDNA qPCR assay on *L.*  
313 *infantum*-spiked *L. longipalpis* sand flies [13]. This substantiates that the sensitivity of qPCR assays  
314 targeting SL-RNA and kDNA are comparable, which corroborates the comparative assessment performed  
315 in this study. Moreover, congruence of the assays appears very good, indicating that both can achieve  
316 reliable quantification. Based on the standard curve, it can be concluded that SL-RNA qPCR can quantify  
317 down to 10 parasites per sand fly with high PCR efficiency, which is sufficient for determination of  
318 biologically relevant parasite loads.

319 Overall, this study shows for the first time that the SL-RNA target can be used for detection and  
320 quantification of *Leishmania* parasites in field and laboratory infected sand flies, even in combination  
321 with a crude extraction method. The SL-RNA qPCR assay provides complementary information to the  
322 standard kDNA assays, as it is pan-*Leishmania* specific and able to detect viable parasites, which can be a  
323 major advantage for eco-epidemiological studies including identification of vectors and reservoirs.

## 324 Acknowledgements

325 We are grateful to Dr. Gert Van der Auwera (Institute of Tropical Medicine, Antwerp, Belgium) for his  
326 advice on the interpretation of the experiments. We would also like to thank the village head and field  
327 workers in Ochollo for the possibility to collect the sand fly and hyrax samples.

## 328 References

- 329 1. Parasites - Leishmaniasis [Internet]. Center of disease control and prevention. 2013 [cited 2018  
330 Sep 7]. Available from: <https://www.cdc.gov/parasites/leishmaniasis/biology.html>
- 331 2. Bray RS, Ashford RW, Bray MA. The parasite causing cutaneous leishmaniasis in Ethiopia. *Trans R*  
332 *Soc Trop Med Hyg.* 1973;67(3):345–8.
- 333 3. Ashford W, Bray M, Hutchinson P, Bray S. The epidemiology of cutaneous leishmaniasis in  
334 Ethiopia. *Trans R Soc Trop Med Hyg.* 1973;67(4).
- 335 4. Lemma W, Erenso G, Gadisa E, Balkew M, Gebre-michael T, Hailu A. A zoonotic focus of  
336 cutaneous leishmaniasis in Addis Ababa, Ethiopia. *Parasit Vectors.* 2009;2(60).
- 337 5. Ashford RW. A possible reservoir for *Leishmania tropica* in Ethiopia. *Trans R Soc Trop Med Hyg.*  
338 1970;64(6):936–7.
- 339 6. Rogers ME, Bates PA. *Leishmania* Manipulation of Sand Fly Feeding Behavior Results in Enhanced  
340 Transmission. *PLOS Pathog.* 2007;3(6):1–7.
- 341 7. Galluzzi L, Ceccarelli M, Diotallevi A, Menotta M, Magnani M. Real-time PCR applications for  
342 diagnosis of leishmaniasis. *Parasit Vectors.* 2018;11(273).
- 343 8. Asghar U, Malik MF, Anwar F, Javed A, Raza A. DNA Extraction from Insects by Using Different  
344 Techniques: A Review. *Adv Entomol.* 2015;3:132–8.
- 345 9. Kato H, Uezato H, Gomez EA, Terayama Y, Calvopiña M, Iwata H. Establishment of a mass  
346 screening method of sand fly vectors for *Leishmania* infection by molecular biological methods.  
347 *Am J Trop Med Hyg.* 2007;77(2):324–9.
- 348 10. Odiwuor SOC, Saad AA, Doncker S De, Maes I, Laurent T. Universal PCR assays for the differential  
349 detection of all Old World *Leishmania* species. 2011;209–18.
- 350 11. Simpson L, Douglass SM, Lake JA, Pellegrini M, Li F. Comparison of the Mitochondrial Genomes  
351 and Steady State Transcriptomes of Two Strains of the Trypanosomatid Parasite, *Leishmania*



- 352            *tarentolae*. PLoS Negl Trop Dis. 2015;9(7):1–35.
- 353    12.    Aransay ANAM, Scoulica E, Tselentis Y. Detection and Identification of *Leishmania* DNA within  
354            Naturally Infected Sand Flies by Seminested PCR on Minicircle Kinetoplastic DNA.  
355            2000;66(5):1933–8.
- 356    13.    Bezerra-vasconcelos DR, Melo LM, Albuquerque ÉS, Luciano MCS, Bevilaqua CML. Real-time PCR  
357            to assess the *Leishmania* load in *Lutzomyia longipalpis* sand flies: Screening of target genes and  
358            assessment of quantitative methods. Exp Parasitol. 2011;129:234–9.
- 359    14.    Nicolas L, Prina E, Lang T, Milon G. Real-Time PCR for Detection and Quantitation of *Leishmania* in  
360            Mouse Tissues. 2002;40(5):1666–9.
- 361    15.    Kassahun A, Sadlova J, Dvorak V, Kostalova T, Rohousova I, Frynta D, et al. Detection of  
362            *Leishmania donovani* and *L. tropica* in Ethiopian wild rodents. Acta Trop. 2015;145:39–44.
- 363    16.    Kassahun A, Sadlova J, Benda P, Kostalova T, Warburg A, Hailu A, et al. Natural infection of bats  
364            with *Leishmania* in Ethiopia. Acta Trop. 2015;150:166–70.
- 365    17.    Mary C, Lascombe L, Dumon H, Al MET, Icrobiol JCLINM. Quantification of *Leishmania infantum*  
366            DNA by a Real-Time PCR Assay with High Sensitivity. J Clin Microbiol. 2004;42(11):5249–55.
- 367    18.    Weirather JL, Jeronimo SMB, Gautam S, Sundar S, Kang M, Kurtz MA, et al. Serial Quantitative PCR  
368            Assay for Detection, Species Discrimination, and Quantification of *Leishmania spp.* in Human  
369            Samples. J Clin Microbiol. 2011;49(11):3892–904.
- 370    19.    Volpini C, Passos VMA, Correa G, Romanha AJ. PCR-RFLP to identify *Leishmania (Viannia)*  
371            *braziliensis* and *L. (Leishmania) amazonensis* causing American cutaneous leishmaniasis.  
372            2004;90:31–7.
- 373    20.    Boni SM, Oyafuso LK, Soler RDC. Efficiency of noninvasive sampling methods (swab) together  
374            with Polymerase Chain Reaction (PCR) for diagnosing American Tegumentary Leishmaniasis. Rev  
375            do Inst Med Trop Sao Paulo. 2017;

- 376 21. Satow MM, Yamashiro-kanashiro EH, Rocha MC, Oyafuso LK, Soler RC. Applicability of kDNA-PCR  
377 for routine diagnosis of American tegumentary leishmaniasis in a tertiary reference hospital.  
378 2013;55(6):393–9.
- 379 22. Keer JT, Birch L. Molecular methods for the assessment of bacterial viability. J Microbiol Methods.  
380 2003;53:175–83.
- 381 23. Eberhardt E, Van Den Kerkhof M, Bulté D, Mabile D, Van Bockstal L, Monnerat S, et al. Evaluation  
382 of a pan-*Leishmania* Spliced-Leader RNA detection method in human blood and experimentally  
383 infected syrian golden hamsters. J Mol Diagnostics. 2018;20(2).
- 384 24. Pareyn M, Van Den Bosch E, Girma N, Houtte N Van, Van Dongen S, Van Der Auwera G, et al.  
385 Ecology and seasonality of sandflies and potential reservoirs of cutaneous leishmaniasis in  
386 Ochollo, a hotspot in southern Ethiopia. PLoS Negl Trop Dis. 2019;13(8).
- 387 25. Mengistu G, Laskay T, Gemetchu T, Humber D, Ersamo M, Eva D, et al. Cutaneous leishmaniasis in  
388 south-western Ethiopia: Ocholo revisited. Trans R Soc Trop Med Hyg. 1992;86:149–53.
- 389 26. Assefa A. Leishmaniasis in Ethiopia : A systematic review and meta-analysis of prevalence in  
390 animals and humans. Heliyon. 2018;(June):e00723.
- 391 27. Perry KL, Watkins KP, Agabian N. Trypanosome mRNAs have unusual “cap 4” structures acquired  
392 by addition of a spliced leader. Proc Natl Acad Sci USA. 1987;84:8190–4.
- 393 28. Analysis RP, Cangelosi GA, Weigel KM, Lefthand-begay C, Meschke JS. Molecular Detection of  
394 Viable Bacterial Pathogens in Water by Ratiometric Pre-rRNA Analysis. Appl Environ Microbiol.  
395 2010;76(3):960–2.
- 396 29. Gabaint AVON, Belasco JG, Schottel JL, Annie CY, Cohen SN. Decay of mRNA in *Escherichia coli*:  
397 Investigation of the fate of specific segments of transcripts. Natl Acad Sci. 1983;80:653–7.
- 398 30. Debode F, Marien A, Janssen É, Bragard C, Berben G. The influence of amplicon length on real-  
399 time PCR results. Biotechnol Agron Soc Environ. 2017;21(1):3–11.

- 400 31. Kuang J, Yan X, Genders AJ, Granata C, Bishop DJ. An overview of technical considerations when  
401 using quantitative real-time PCR analysis of gene expression in human exercise research. PLoS  
402 One. 2018;13(5).
- 403 32. Srivastava P, Mehrotra S, Tiwary P, Chakravarty J, Sundar S. Diagnosis of Indian Visceral  
404 Leishmaniasis by Nucleic Acid Detection Using PCR. PLoS One. 2011;6(4).
- 405 33. González-andrade P, Camara M, Ilboudo H, Bucheton B, Jamonneau V. Diagnosis of  
406 Trypanosomatid Infections Targeting the Spliced Leader RNA. J Mol Diagnostics. 2014;16(4):400–  
407 4.
- 408 34. Simpson L. Kinetoplast DNA in Trypanosomid Flagellates. Int Rev Cytol. 1986;99:119–79.
- 409 35. Tuo D, Shen W, Yang Y, Yan P, Li X, Zhou P. Development and Validation of a Multiplex Reverse  
410 Transcription PCR Assay for Simultaneous Detection of Three Papaya Viruses. Viruses.  
411 2014;341:3893–906.
- 412 36. Yao B, Wang G, Ma X, Liu W, Tang H, Zhu H. Simultaneous detection and differentiation of three  
413 viruses in pear plants by a multiplex RT-PCR. J Virol Methods. 2014;196:113–9.

## 414 Supporting information captions

415 **S1 Table: qPCR results of sand fly and hyrax samples from the laboratory and field in four different assays.** For each assay the  
416 mean cycle threshold value ( $\pm$  standard deviation) are presented.

417 **S1 Fig: Annealing of MP kDNA qPCR primers to *L. aethiopica* kDNA (GenBank: U77892.1).**

418 **S1 Data: Dataset of laboratory infected (*Leishmania major*) *Lutzomyia longipalpis* sand flies screened by SL-RNA, 18S DNA,  
419 MP kDNA and JW kDNA qPCR assays.**

420 **S2 Data: Dataset of field collected (Ethiopia) *Phlebotomus pedifer* sand flies (some infected by *Leishmania aethiopica*)  
421 screened by SL-RNA, 18S DNA, MP kDNA and JW kDNA qPCR assays.**

422 **S3 Data: Dataset of Dataset of field (Ethiopia) collected *Heterohyrax brucei* tissue samples (some infected by *Leishmania*  
423 *aethiopica*) screened by SL-RNA, 18S DNA, MP kDNA and JW kDNA qPCR assays.**

424 **S4 Data: Data of extraction method and copy number comparison.**

425 **S5 Data: Data of standard curve of the SL-RNA qPCR based on *Lutzomyia longipalpis* sand flies spiked with *Leishmania major*.**

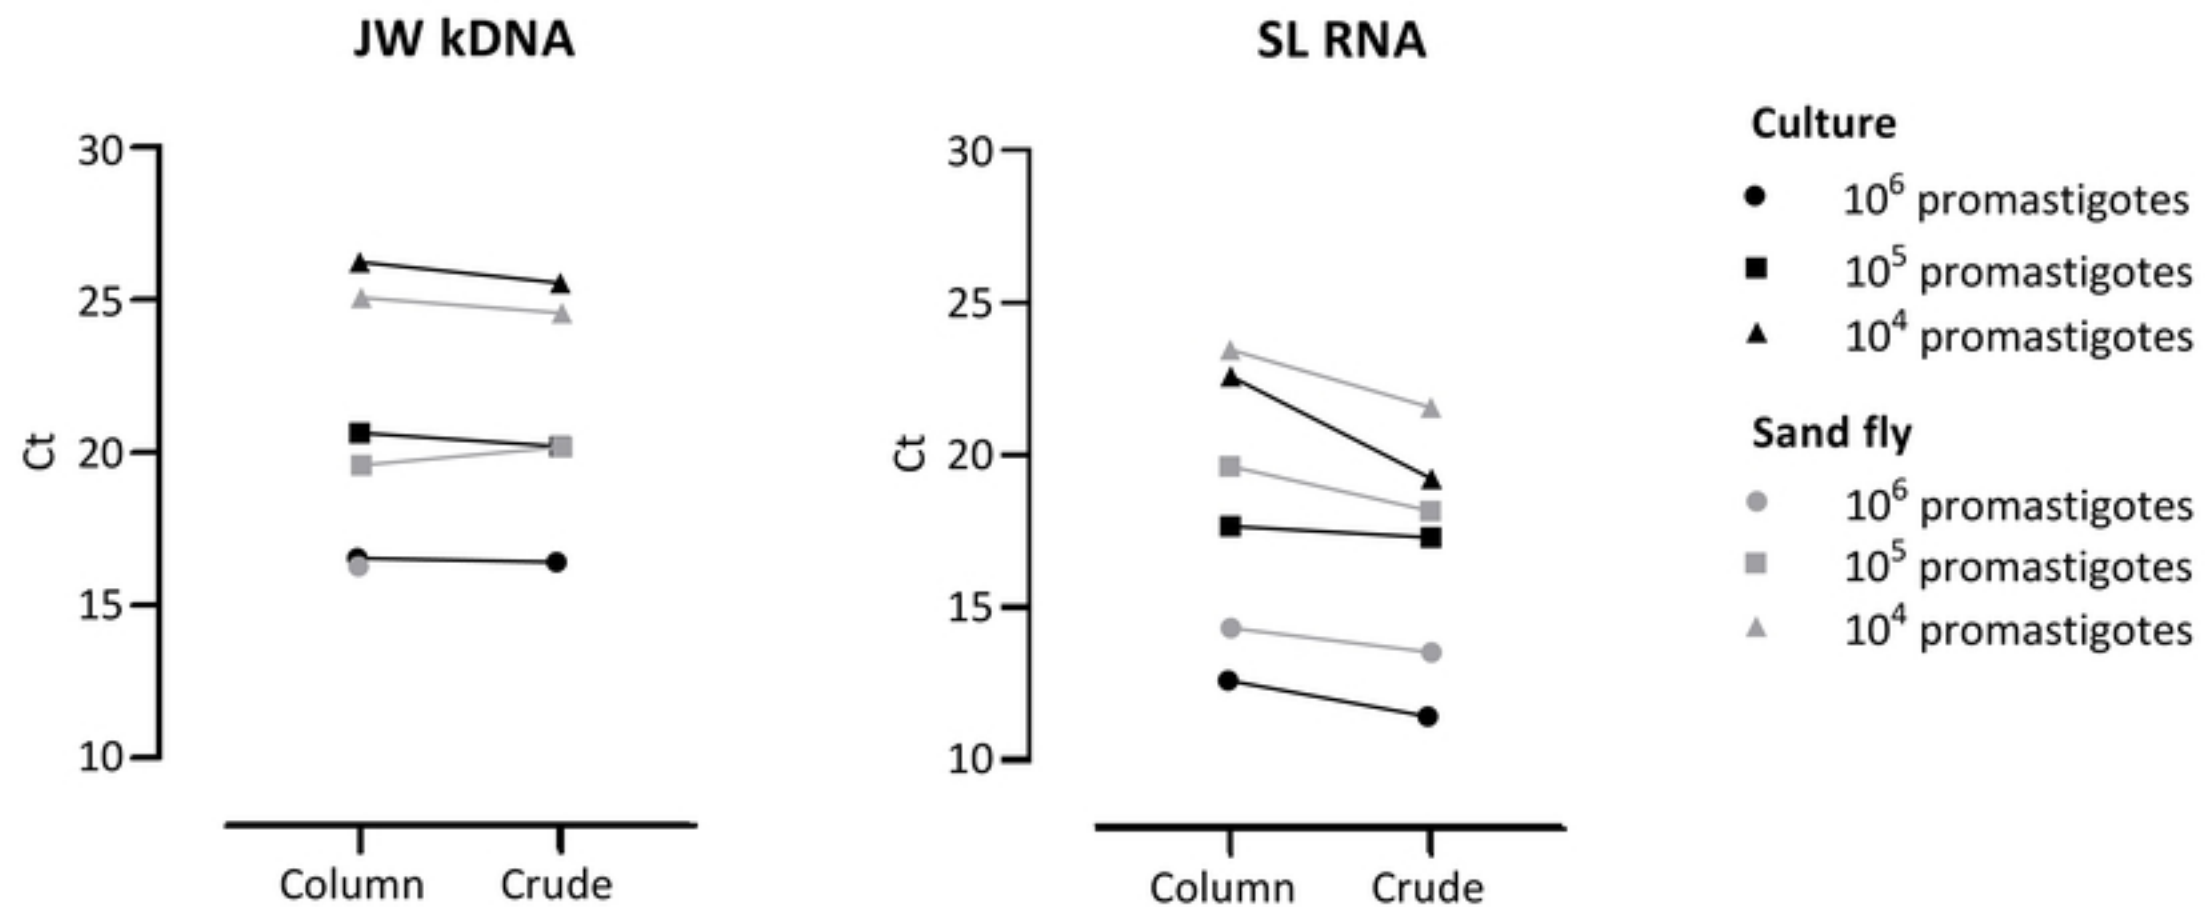

Fig 3

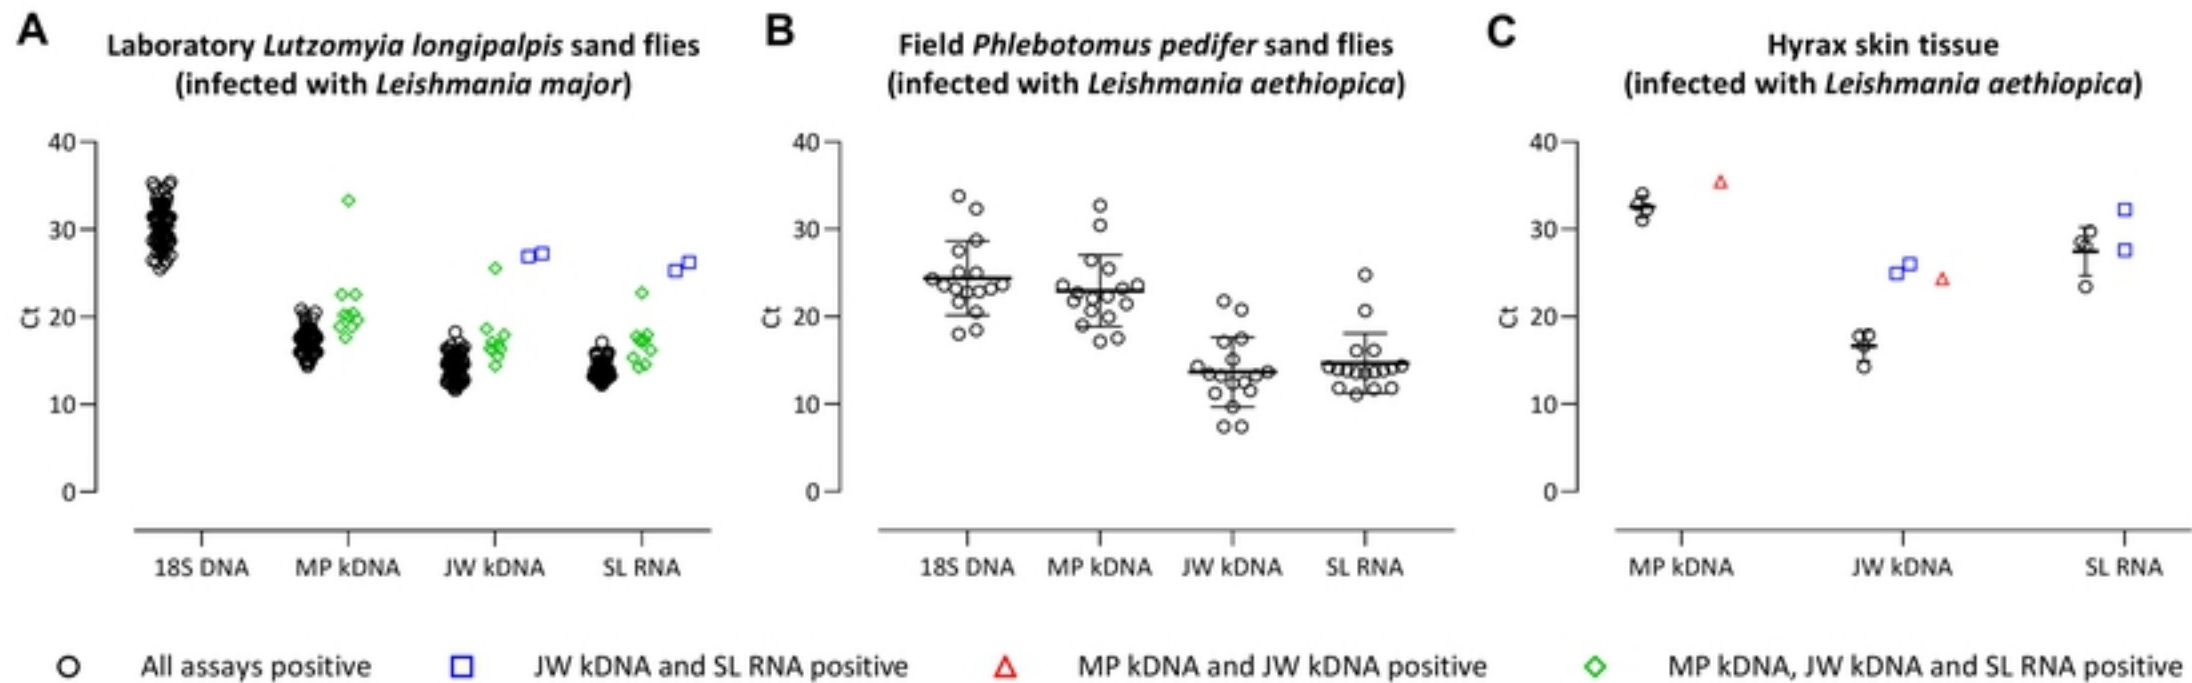

Fig 1

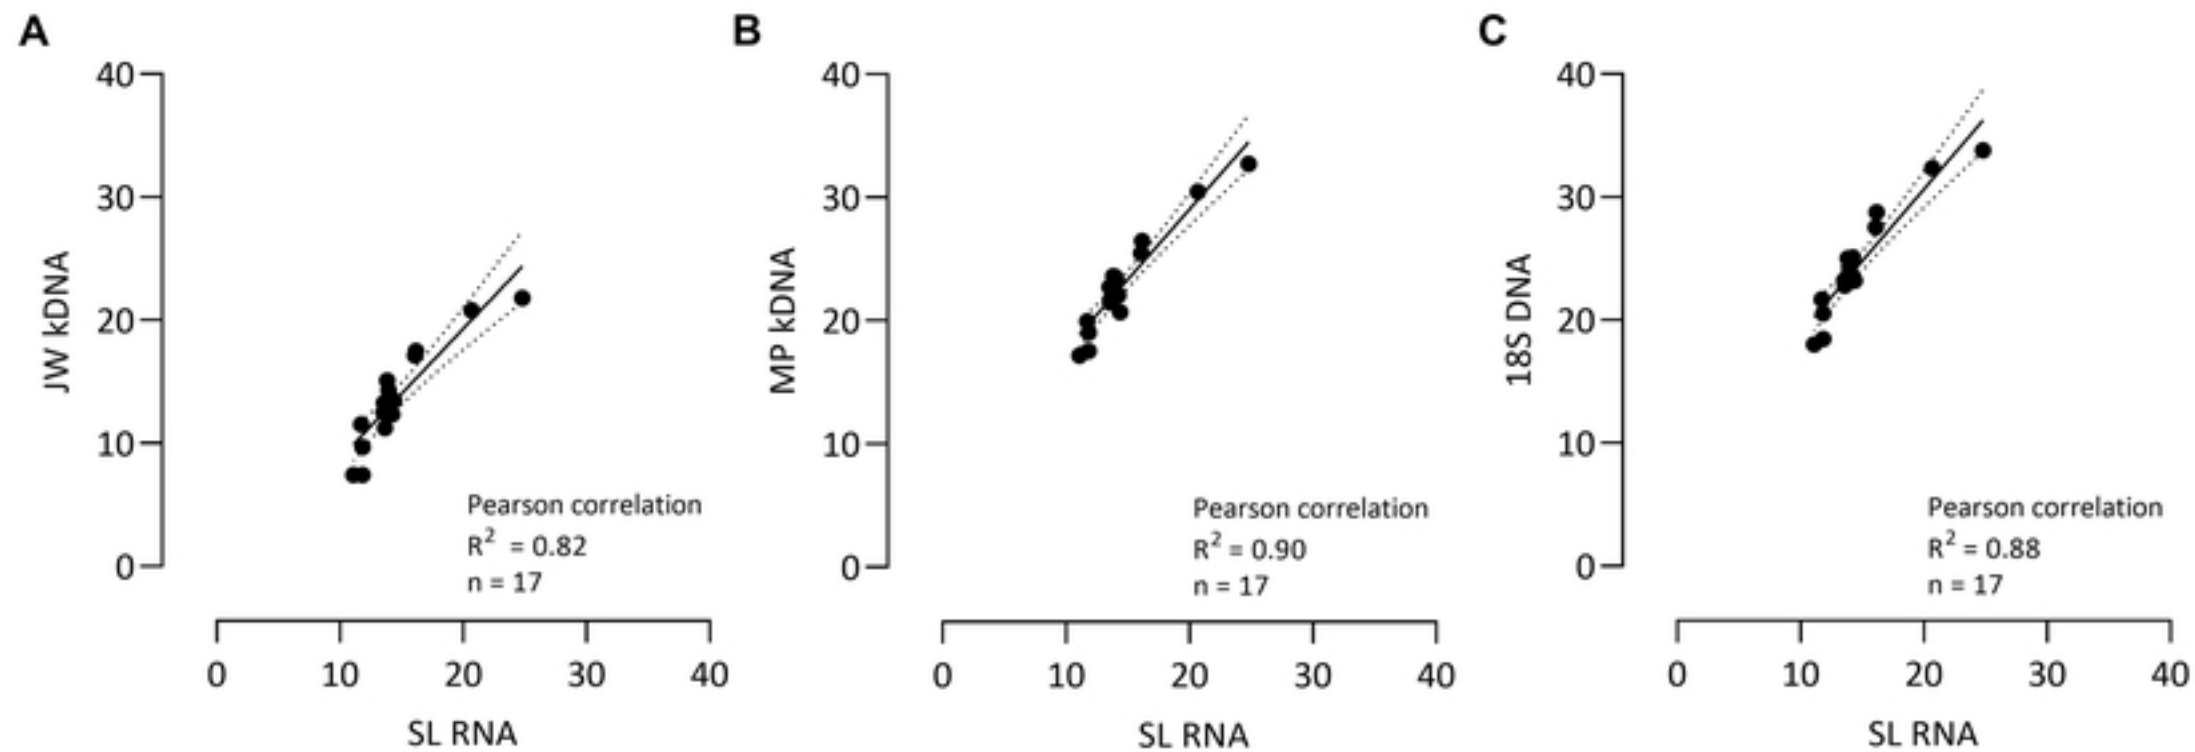

Fig 2

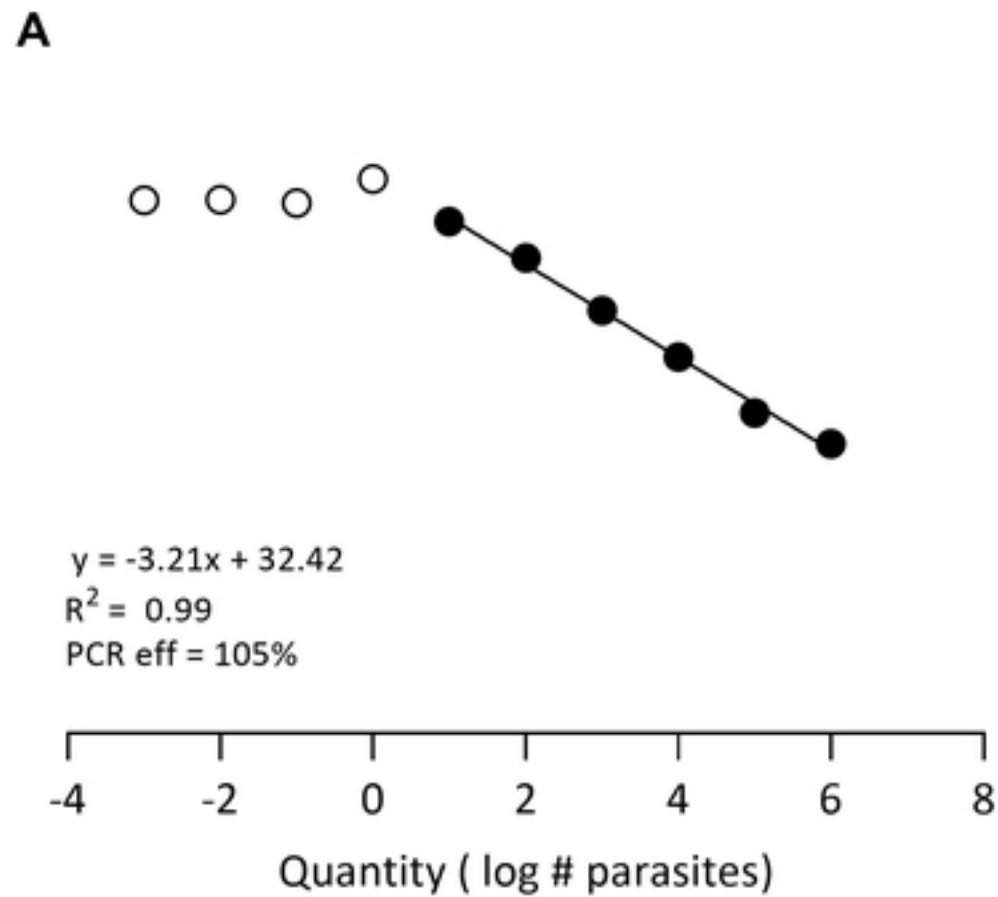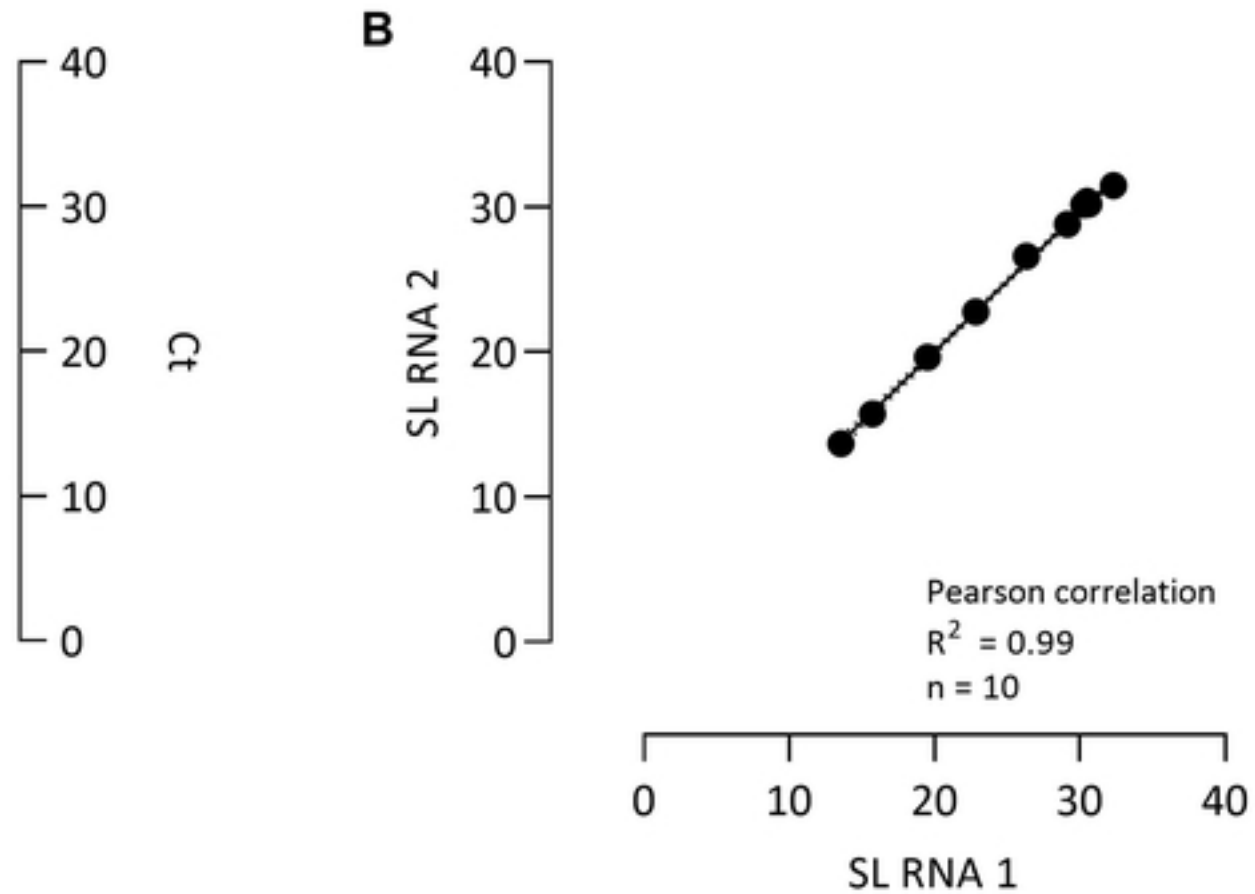

Fig 4
